# Supplementary material for: Large barocaloric effects in two novel ferroelectric molecular plastic crystals
Source: Royal Society of Chemistry journal article supplement (doi:10.1039/d2ta10033a), 2023-01-01
Supplement: d2ta10033a1.pdf [file d2ta10033a1.pdf]

## Supplementary Information

### Large barocaloric effects in two novel ferroelectric molecular plastic crystals

*Alejandro Salvatori, David Aguilà, Guillem Aromí, Lluís Mañosa, Antoni Planes, Pol Lloveras, Luis Carlos Pardo, Markus Appel, Guillaume F. Nataf, Fabien Giovannelli, Maria Barrio, Josep Lluís Tamarit, and Michela Romanini*

#### 1. Computation of the Entropy Curves

The entropy curve across the III to II and II to I phase transitions for HQin is computed as follows:

$$S(T,p) = \begin{cases} S(T_0,p) + \int_{T_0}^T \frac{C_p^{III}}{T} dT & T_0 \leq T \leq T_1(p) \\ S(T_1,p) + \int_{T_1}^T \frac{1}{T} \left( C_p + \frac{dQ}{dT} \right) dT & T_1(p) \leq T \leq T_2(p) \\ S(T_2,p) + \int_{T_2}^T \frac{C_p^{II}}{T} dT & T_2(p) \leq T \leq T_3(p) \\ S(T_3,p) + \int_{T_3}^T \frac{1}{T} \left( C_p^* + \frac{dQ}{dT} \right) dT & T_3(p) \leq T \leq T_4(p) \\ S(T_4,p) + \int_{T_4}^T \frac{C_p^I}{T} dT & T_4(p) \leq T \end{cases}$$

Where  $C_p = xC_p^{II} + (1-x)C_p^{III}$  and  $C_p^* = x^*C_p^I + (1-x^*)C_p^{II}$ ;  $x$  and  $x^*$  are the fraction of the sample in the phase II and I respectively, calculated as:

$$x(T,p) = \frac{\int_{T_1}^T \frac{1dQ}{TdT}}{\int_{T_1}^{T_2} \frac{1dQ}{TdT}}$$

where  $T_1$  and  $T_2$  are the starting and finishing temperatures of the transition peak in  $\frac{1dQ}{TdT}$ .

## 2. X-Ray diffraction

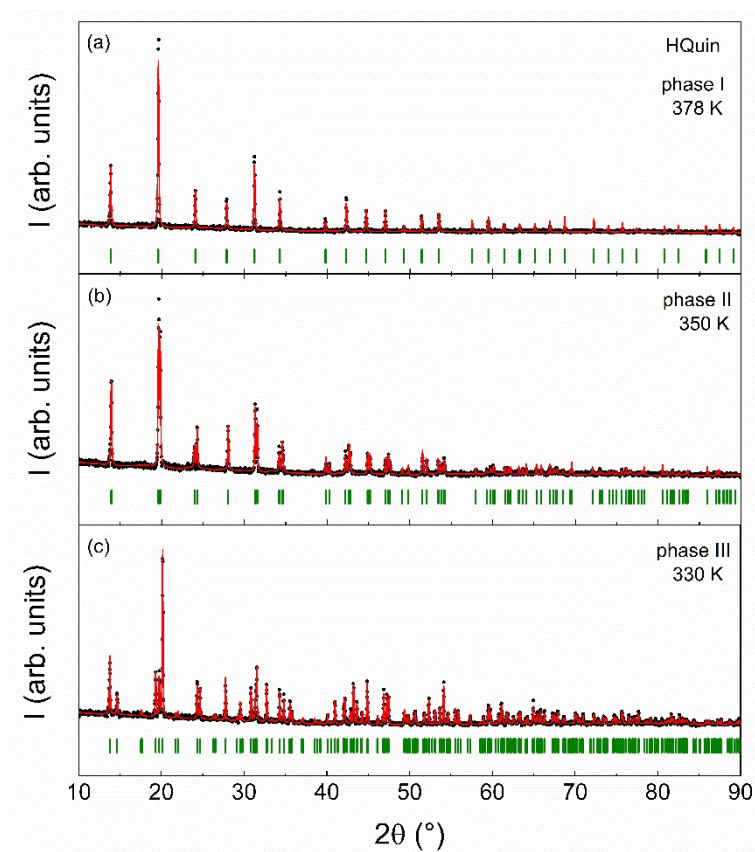

*Fig. S1: XRPD patterns recorded at 378 K (phase I, panel a), 350 K (phase II, panel b) and 330 K (phase III, panel c) for HQuin in the interval  $2\theta = (10, 90)^\circ$ . Black symbols correspond to experimental data, red lines are calculated patterns via a pattern matching fitting procedure and green lines indicate the position of the Bragg peaks.*

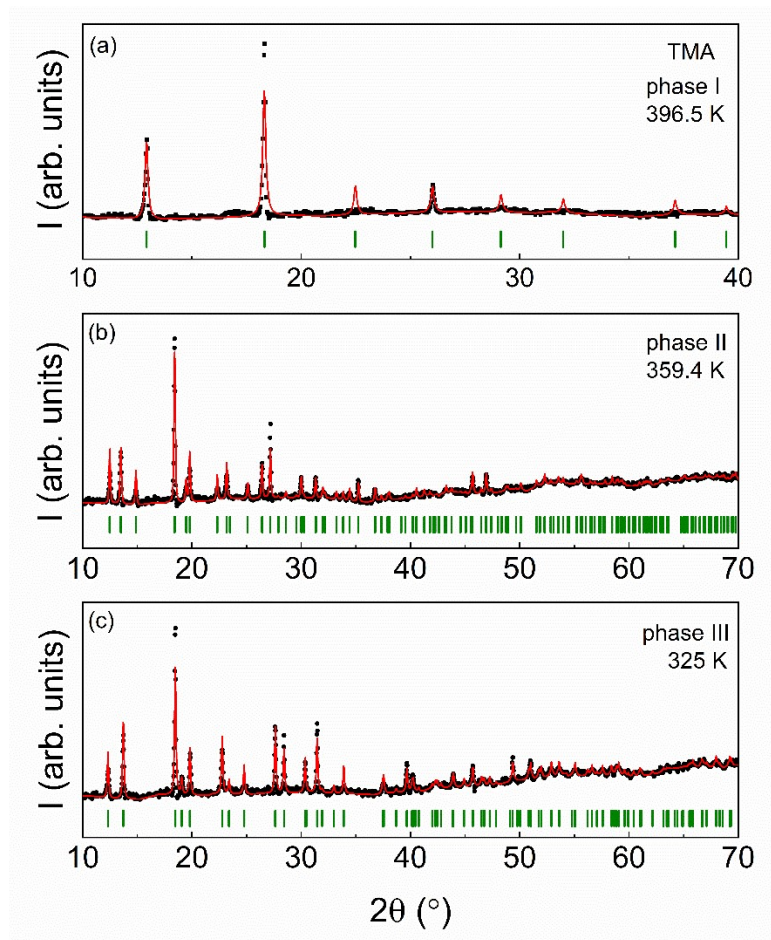

Fig. S2: XRPD patterns recorded at 396.5 K (phase I, panel a), 359.4 K (phase II, panel b) and 325 K (phase III, panel c) for TMA in the interval  $2\theta = (10, 70)^\circ$ . Black symbols correspond to experimental data, red lines are calculated patterns via a pattern matching fitting procedure and green lines indicate the position of the Bragg peaks.

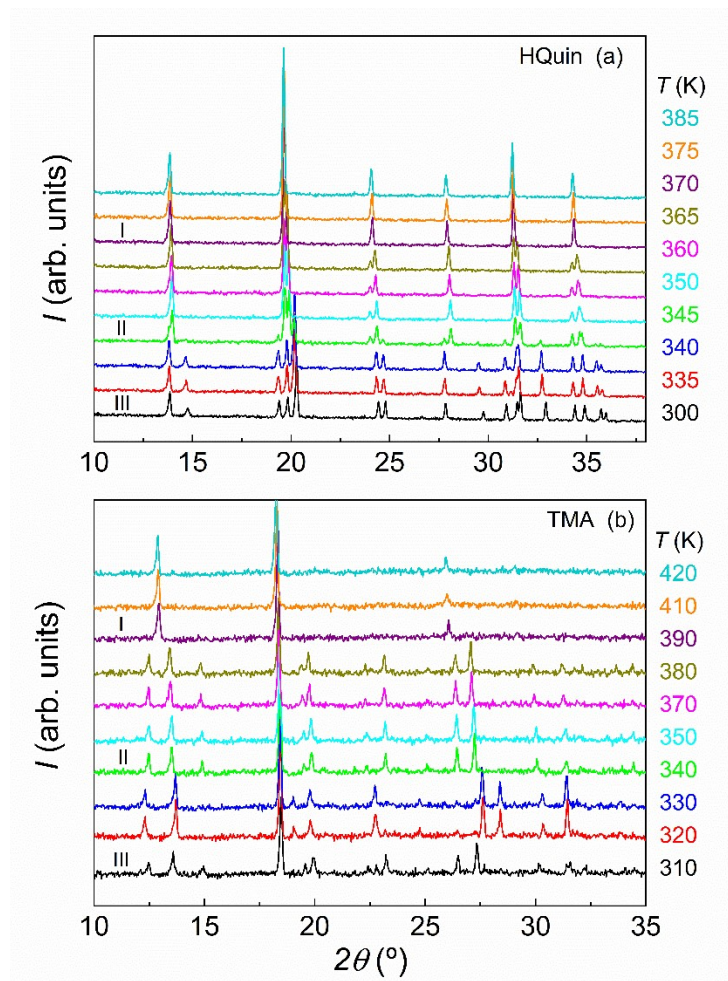

Fig. S3: Temperature evolution of the XRPD patterns through the I-II and II-III phase transitions for HQUIN (panel a) and TMA (panel b)

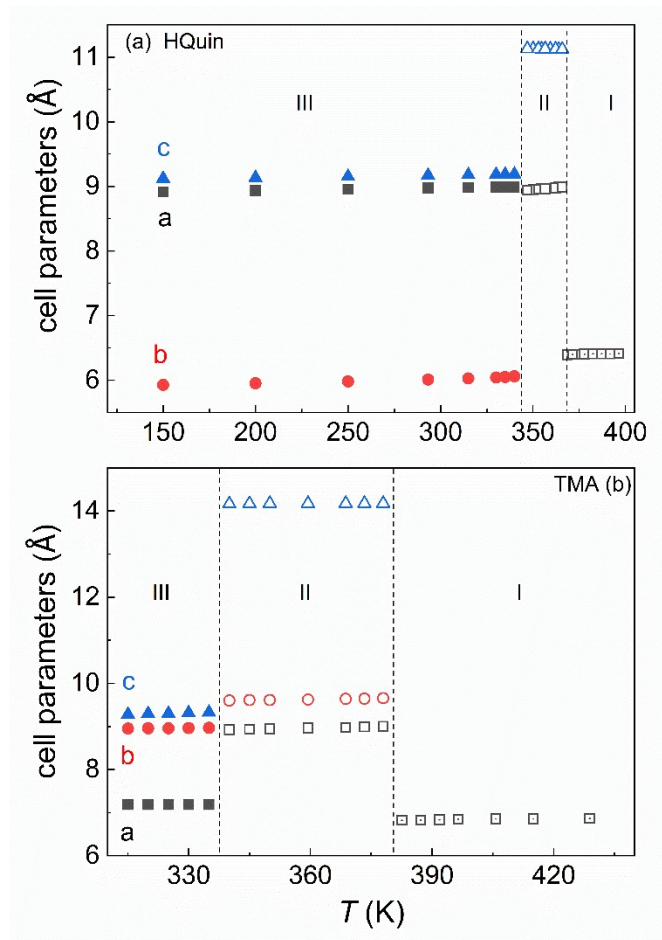

Fig. S4: Normal pressure temperature evolution of the lattice parameters for HQuin (panel a) and TMA (panel b)

### 3. Heat Capacity

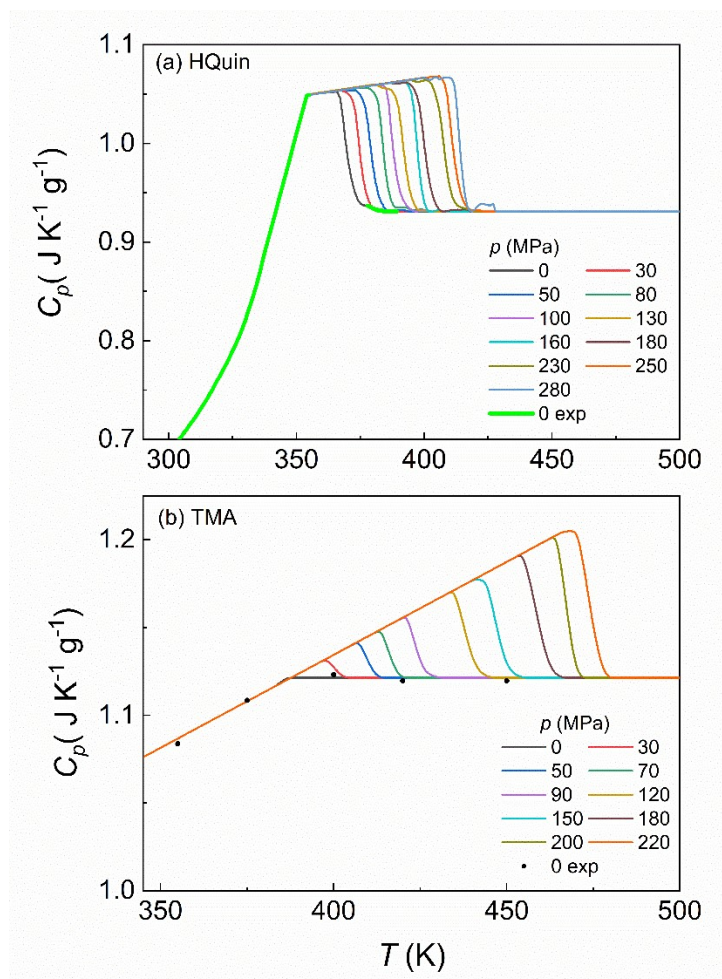

Fig. S5: Pressure-dependent heat capacity constructed from normal pressure modulated DSC experiment for HQuin (panel a) and from isothermal heat-capacity measurements for TMA (panel b)

#### 4. Thermal Conductivity

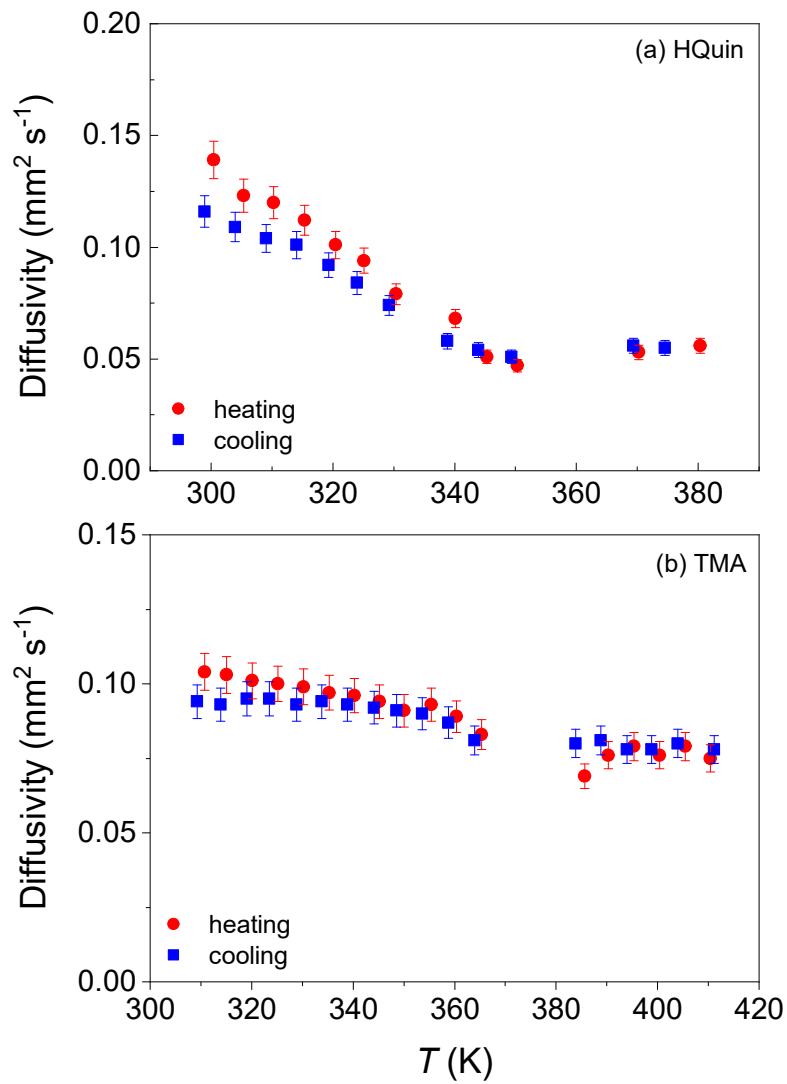

Fig. S6: Thermal diffusivity as a function of temperature for HQuin (panel a) and TMA (panel b). Error bars indicate a  $\pm 6\%$  error on the absolute values.

## 5. Comparison to other barocaloric materials

Table 1: Transition temperature  $T_t$ , reversible entropy change and reversible temperature change under pressure changes  $\Delta p$ , hysteresis and thermal conductivity for different barocaloric materials (data in brackets indicates irreversible processes).

| Material                                                                          | $T_t$<br>(K) | $\Delta p$<br>(MPa) | $\Delta S_{rev}$<br>(J kg <sup>-1</sup> K <sup>-1</sup> ) | $\Delta T_{rev}$<br>(K) | $\Delta T_{hyst}$<br>(K) | $\kappa$<br>(W m <sup>-1</sup> K <sup>-1</sup> ) | Ref.      |
|-----------------------------------------------------------------------------------|--------------|---------------------|-----------------------------------------------------------|-------------------------|--------------------------|--------------------------------------------------|-----------|
| <b>Ferroelectric plastic crystals</b>                                             |              |                     |                                                           |                         |                          |                                                  |           |
| TMA                                                                               | 384          | 90                  | 81                                                        | 21                      | 0                        | 0.12-0.14                                        | this work |
| HQuin (III-II)                                                                    | 344          | 100                 | 60                                                        | 6                       | 3                        | 0.11-0.17                                        | this work |
| HQuin (II-I)                                                                      | 367          | 100                 | 26                                                        | 8                       | 0                        | 0.11                                             | this work |
| <b>Plastic crystals</b>                                                           |              |                     |                                                           |                         |                          |                                                  |           |
| (CH <sub>3</sub> )C(CH <sub>2</sub> OH) <sub>3</sub>                              | 354          | 150                 | 252                                                       | 4                       | 12                       | 0.23-0.36                                        | [1,2]     |
| (CH <sub>3</sub> ) <sub>2</sub> C(CH <sub>2</sub> OH) <sub>2</sub>                | 315          | 190                 | 165                                                       | 6                       | 24                       | 0.11-0.37                                        | [2,3]     |
| (CH <sub>3</sub> ) <sub>3</sub> C(CH <sub>2</sub> OH)                             | 232          | 260                 | 320                                                       | 16                      | 40                       | -                                                | [1]       |
| C <sub>10</sub> H <sub>15</sub> Br                                                | 250          | 100                 | 136                                                       | 19                      | 8                        | -                                                | [4]       |
| C <sub>10</sub> H <sub>15</sub> Cl                                                | 312          | 100                 | 159                                                       | 21                      | 11                       | -                                                | [4]       |
| 1-Adamantanol                                                                     | 359          | 160                 | 175                                                       | 11                      | 15                       | -                                                | [5]       |
| 2-Adamantanol                                                                     | 389          | 130                 | 65                                                        | 6                       | 1                        | -                                                | [5]       |
| C <sub>11</sub> H <sub>18</sub> O                                                 | 368          | 80                  | 300                                                       | 7                       | 11                       | -                                                | [5]       |
| <i>ortho</i> -carborane                                                           | 277          | 60                  | 80                                                        | -                       | 8                        | -                                                | [6]       |
| <i>para</i> -carborane                                                            | 308          | 60                  | 97                                                        | -                       | 11                       | -                                                | [6]       |
| <i>meta</i> -carborane                                                            | 286          | 60                  | 71                                                        | -                       | 9                        | -                                                | [6]       |
| C <sub>60</sub>                                                                   | 256          | 100                 | 31                                                        | 10                      | 3                        | 0.4                                              | [7,8]     |
| <b>Inorganic materials</b>                                                        |              |                     |                                                           |                         |                          |                                                  |           |
| NH <sub>4</sub> I                                                                 | 275          | 40                  | 71                                                        | 34                      | 25                       | 0.7                                              | [9,10]    |
| KPF <sub>6</sub>                                                                  | 298          | 80                  | 144                                                       | -                       | -                        | -                                                | [11]      |
| NH <sub>4</sub> SCN                                                               | 362          | 100                 | (128)                                                     | (30)                    | 25                       | -                                                | [12]      |
| <b>Spin-crossover materials</b>                                                   |              |                     |                                                           |                         |                          |                                                  |           |
| Fe <sub>3</sub> (bntz) <sub>6</sub> (tcnset) <sub>6</sub>                         | 318          | 100                 | 95                                                        | 22                      | 2                        | -                                                | [13]      |
| <b>Hybrid perovskites</b>                                                         |              |                     |                                                           |                         |                          |                                                  |           |
| (C <sub>10</sub> H <sub>21</sub> NH <sub>3</sub> ) <sub>2</sub> MnCl <sub>4</sub> | 312          | 100                 | 250                                                       | 12                      | 9                        | 0.36                                             | [14,15]   |
| <b>Polymers</b>                                                                   |              |                     |                                                           |                         |                          |                                                  |           |
| Acetoxy Silicone Rubber                                                           | 250          | 170                 | 182                                                       | 21                      | 14                       | -                                                | [16]      |

### References:

1. A. Aznar, P. Lloveras, M. Barrio, P. Negrier, A. Planes, L. Mañosa, N. Mathur, X. Moya and J. L. Tamarit, *J. Mater. Chem. A*, 2020, 8, 639.
2. P. Lloveras and J. L. Tamarit, *MRS Energy & Sustainability*, 2021, 8, 3–15
3. P. Lloveras, A. Aznar, M. Barrio, P. Negrier, C. Popescu, A. Planes, L. Mañosa, E. Stern-Taulats, A. Avramenko, N. D. Mathur, X. Moya and J. L. Tamarit, *Nat. Commun.*, 2019, 10, 1803.
4. A. Aznar, P. Negrier, A. Planes, L. Mañosa, E. Stern-Taulats, X. Moya, M. Barrio, J. L. Tamarit and P. Lloveras, *Appl. Mater. Today*, 2021, 23, 101023.
5. A. Salvatori, P. Negrier, A. Aznar, M. Barrio, J. L. Tamarit and P. Lloveras, *APL Mater.*, 2022, 10, 111117.
6. K. Zhang, R. Song, J. Qi, Z. Zhang, Z. Zhang, C. Yu, K. Li, Z. Zhang and B. Li, *Adv. Funct. Mater.*, 2022, 32, 2112622.



7. J. Li, D. Dunstan, X. Lou, A. Planes, L. Mañosa, M. Barrio, J. Tamarit and P. Lloveras, *J. Mat. Chem. A*, 2020, 8, 20354.
8. N. H. Tea, R. C. Yu, M. B. Salamon, D. C. Lorents, R. Malhotra and R. S. Ruoff, *Applied Physics A*, 1993, 56, 219.
9. R. G. Ross and P. Anderson, *J. Phys. C: Solid State Phys.*, 1987, 20, 4745.
10. Q. Ren, J. Qi, D. Yu, Z. Zhang, R. Song, W. Song, B. Yuan, T. Wang, W. Ren, Z. Zhang, X. Tong and B. Li, *Nat. Comm.*, 2022, 13, 2293.
11. Z. Zhang, X. Jiang, T. Hattori, X. Xu, M. Li, C. Yu, Z. Zhang, D. Yu, R. Mole, S. Yano, J. Chen, L. He, C. Wang, H. Wang, B. Li and Z. Zhang, *Mater. Horiz.*, 2023, 10, 977.
12. Z. Zhang, K. Li, S. Lin, R. Song, D. Yu, Y. Wang, J. Wang, S. Kawaguchi, Z. Zhang, C. Yu, X. Li, J. Chen, L. He, R. Mole, B. Yuan, Q. Ren, K. Qian, Z. Cai, J. Yu, M. Wang, C. Zhao, X. Tong, Z. Zhang, B. Li, *Sci. Adv.*, 2023, 9, eadd0374.
13. M. Romanini, Y. Wang, K. Gürpınar, G. Ornelas, P. Lloveras, Y. Zhang, W. Zheng, M. Barrio, A. Aznar, G.-C. A, B. Emre, O. Atakol, C. Popescu, H. Zhang, Y. Long, L. Balicas, J. L. Tamarit, A. Planes, M. Shatruk and L. Mañosa, *Adv. Mater.*, 2021, 33, 2008076.
14. J. Li, M. Barrio, D. J. Dunstan, R. Dixey, X. Lou, J. Tamarit, A. E. Phillips and P. Lloveras, *Ad. Funct. Mater.*, 2021, 31, 2105154.
15. C. R. Raj, S. Suresh, R.R. Bhavsar, V. K. Singh, A. S. Reddy, A. Upadhyay, *Mech. Mater.*, 2019, 135, 88–97.
16. W. Imamura, E.O. Usuda, L.S. Paixao, N.M. Bom, A.M. Gomes, A.M.G. Carvalho, *Chinese J. Polym. Sci.*, 2020, 38, 999.
